# Supplementary material for: Characterization of a New Epidemic Necrotic Pyoderma in Fur Animals and Its Association with Arcanobacterium phocae Infection
Source: PubMed Central journal article supplement (PMC4193818; doi:10.1371/journal.pone.0110210), 2014-10-10
Supplement: pone.0110210.s001.pdf [file pone.0110210.s001.pdf]

Table S1. Microbiological results of individual animals in the study.

|                                    | Sample farm | Sample nro | <i>Arcanobacterium phocae</i> |                           |                    | Streptococcus spp. (this study) | Other bacteria |
|------------------------------------|-------------|------------|-------------------------------|---------------------------|--------------------|---------------------------------|----------------|
|                                    |             |            | PCR                           | High bacterial load CT<31 | Phocae cultivation |                                 |                |
| <b>MINKS</b>                       |             |            |                               |                           |                    |                                 |                |
| DISEASED                           | A           | Pa 835     | [Red]                         | [Red]                     | [Red]              | [Black]                         | [Grey]         |
|                                    | A           | Pa 836     |                               |                           |                    |                                 |                |
|                                    | A           | Pa 837     |                               |                           |                    |                                 |                |
|                                    | A           | Pa 838     |                               |                           |                    |                                 |                |
|                                    | A           | Pa 839     |                               |                           |                    |                                 |                |
|                                    | A           | Pa 840     |                               |                           |                    |                                 |                |
|                                    | A           | Pa 841     |                               |                           |                    |                                 |                |
|                                    | A           | Pa 842     |                               |                           |                    |                                 |                |
|                                    | A           | Pa 843     |                               |                           |                    |                                 |                |
|                                    | A           | Pa 844     |                               |                           |                    |                                 |                |
|                                    | A           | Pa 845     |                               |                           |                    |                                 |                |
|                                    | A           | Pa 886     |                               |                           |                    |                                 |                |
|                                    | A           | Pa 887     |                               |                           |                    |                                 |                |
|                                    | A           | Pa 888     |                               |                           |                    |                                 |                |
|                                    | A           | Pa 889     |                               |                           |                    |                                 |                |
|                                    | A           | Pa 890     |                               |                           |                    |                                 |                |
| A                                  | Pa 891      |            |                               |                           |                    |                                 |                |
| D                                  | Pa 892      |            |                               |                           |                    |                                 |                |
| D                                  | Pa 893      |            |                               |                           |                    |                                 |                |
| D                                  | Pa 894      |            |                               |                           |                    |                                 |                |
| D                                  | Pa 895      |            |                               |                           |                    |                                 |                |
| HEALTHY                            | C           | pa 985     |                               |                           |                    |                                 |                |
|                                    | C           | pa 986     |                               |                           |                    |                                 |                |
|                                    | C           | pa 987     |                               |                           |                    |                                 |                |
|                                    | C           | pa 988     |                               |                           |                    |                                 |                |
|                                    | C           | pa 989     |                               |                           |                    |                                 |                |
|                                    | C           | pa 990     |                               |                           |                    |                                 |                |
|                                    | C           | pa 991     |                               |                           |                    |                                 |                |
|                                    | C           | pa 992     |                               |                           |                    |                                 |                |
|                                    | C           | pa 993     |                               |                           |                    |                                 |                |
|                                    | C           | pa 994     |                               |                           |                    |                                 |                |
| C                                  | pa 995      |            |                               |                           |                    |                                 |                |
| Healthy animals on a diseased farm | A           | Pa 1       |                               |                           |                    |                                 |                |
|                                    | A           | Pa 2       |                               |                           |                    |                                 |                |
|                                    | D           | Pa 3       |                               |                           |                    |                                 |                |
|                                    | D           | Pa 4       |                               |                           |                    |                                 |                |
| <b>FINNRACCOONS</b>                |             |            |                               |                           |                    |                                 |                |
| DISEASED                           | B           | Pa 857     | [Red]                         | [Red]                     | [Red]              | [Black]                         | [Grey]         |
|                                    | B           | Pa 858     |                               |                           |                    |                                 |                |
|                                    | F           | pa 914     |                               |                           |                    |                                 |                |
|                                    | F           | Pa 915     |                               |                           |                    |                                 |                |
|                                    | F           | Pa 916     |                               |                           |                    |                                 |                |
|                                    | F           | Pa 917     |                               |                           |                    |                                 |                |
|                                    | G           | Pa 918     |                               |                           |                    |                                 |                |
|                                    | H           | Pa 922     |                               |                           |                    |                                 |                |
|                                    | H           | Pa 923     |                               |                           |                    |                                 |                |
|                                    | H           | Pa 924     |                               |                           |                    |                                 |                |
|                                    | H           | pa 925     |                               |                           |                    |                                 |                |
|                                    | F           | Pa 944     |                               |                           |                    |                                 |                |
|                                    | F           | Pa 945     |                               |                           |                    |                                 |                |
|                                    | F           | Pa 946     |                               |                           |                    |                                 |                |
|                                    | F           | Pa 947     |                               |                           |                    |                                 |                |
|                                    | F           | pa 948     |                               |                           |                    |                                 |                |
|                                    | F           | Pa 949     |                               |                           |                    |                                 |                |
|                                    | F           | PA 39      |                               |                           |                    |                                 |                |
|                                    | F           | PA 40      |                               |                           |                    |                                 |                |
| K                                  | pa 43       |            |                               |                           |                    |                                 |                |
| K                                  | pa 44       |            |                               |                           |                    |                                 |                |
| HEALTHY                            | A           | Pa 876     |                               |                           |                    |                                 |                |
|                                    | A           | Pa 877     |                               |                           |                    |                                 |                |
|                                    | A           | Pa 878     |                               |                           |                    |                                 |                |
|                                    | A           | Pa 879     |                               |                           |                    |                                 |                |
|                                    | A           | Pa 880     |                               |                           |                    |                                 |                |
|                                    | A           | Pa 881     |                               |                           |                    |                                 |                |
|                                    | A           | Pa 907     |                               |                           |                    |                                 |                |
|                                    | A           | Pa 908     |                               |                           |                    |                                 |                |
|                                    | A           | Pa 909     |                               |                           |                    |                                 |                |
|                                    | A           | Pa 910     |                               |                           |                    |                                 |                |
|                                    | A           | pa 911     |                               |                           |                    |                                 |                |
| <b>FOXES</b>                       |             |            |                               |                           |                    |                                 |                |
| DISEASED                           | C           | Pa 882     | [Red]                         | [Red]                     | [Red]              | [Black]                         | [Grey]         |
|                                    | C           | Pa 883     |                               |                           |                    |                                 |                |
|                                    | C           | Pa 884     |                               |                           |                    |                                 |                |
|                                    | E           | Pa 898     |                               |                           |                    |                                 |                |
|                                    | E           | Pa 899     |                               |                           |                    |                                 |                |
|                                    | E           | Pa 900     |                               |                           |                    |                                 |                |
|                                    | E           | Pa 919     |                               |                           |                    |                                 |                |
|                                    | E           | Pa 920     |                               |                           |                    |                                 |                |
|                                    | E           | Pa 921     |                               |                           |                    |                                 |                |
|                                    | E           | pa 928     |                               |                           |                    |                                 |                |
|                                    | E           | Pa 929     |                               |                           |                    |                                 |                |
|                                    | E           | pa 930     |                               |                           |                    |                                 |                |
|                                    | E           | Pa 931     |                               |                           |                    |                                 |                |
|                                    | E           | Pa 932     |                               |                           |                    |                                 |                |
|                                    | J           | Pa 30      |                               |                           |                    |                                 |                |
|                                    | J           | Pa 31      |                               |                           |                    |                                 |                |
|                                    | J           | Pa 32      |                               |                           |                    |                                 |                |
|                                    | J           | Pa 33      |                               |                           |                    |                                 |                |
| J                                  | Pa 34       |            |                               |                           |                    |                                 |                |
| HEALTHY                            | B           | pa 953     |                               |                           |                    |                                 |                |
|                                    | B           | pa 954     |                               |                           |                    |                                 |                |
|                                    | B           | pa 955     |                               |                           |                    |                                 |                |
|                                    | B           | pa 956     |                               |                           |                    |                                 |                |
|                                    | B           | pa 957     |                               |                           |                    |                                 |                |
|                                    | B           | pa 958     |                               |                           |                    |                                 |                |
|                                    | B           | pa 959     |                               |                           |                    |                                 |                |
|                                    | B           | pa 960     |                               |                           |                    |                                 |                |
|                                    | B           | pa 961     |                               |                           |                    |                                 |                |
|                                    | B           | pa 962     |                               |                           |                    |                                 |                |
|                                    | B           | pa 963     |                               |                           |                    |                                 |                |
|                                    | B           | pa 964     |                               |                           |                    |                                 |                |
